# Supplementary material for: Islands as a crossroad of evolutionary lineages: A case study of Centaurea sect. Centaurea (Compositae) from Sardinia (Mediterranean Basin)
Source: PubMed Central journal article supplement (PMC7006937; doi:10.1371/journal.pone.0228776), 2020-02-07

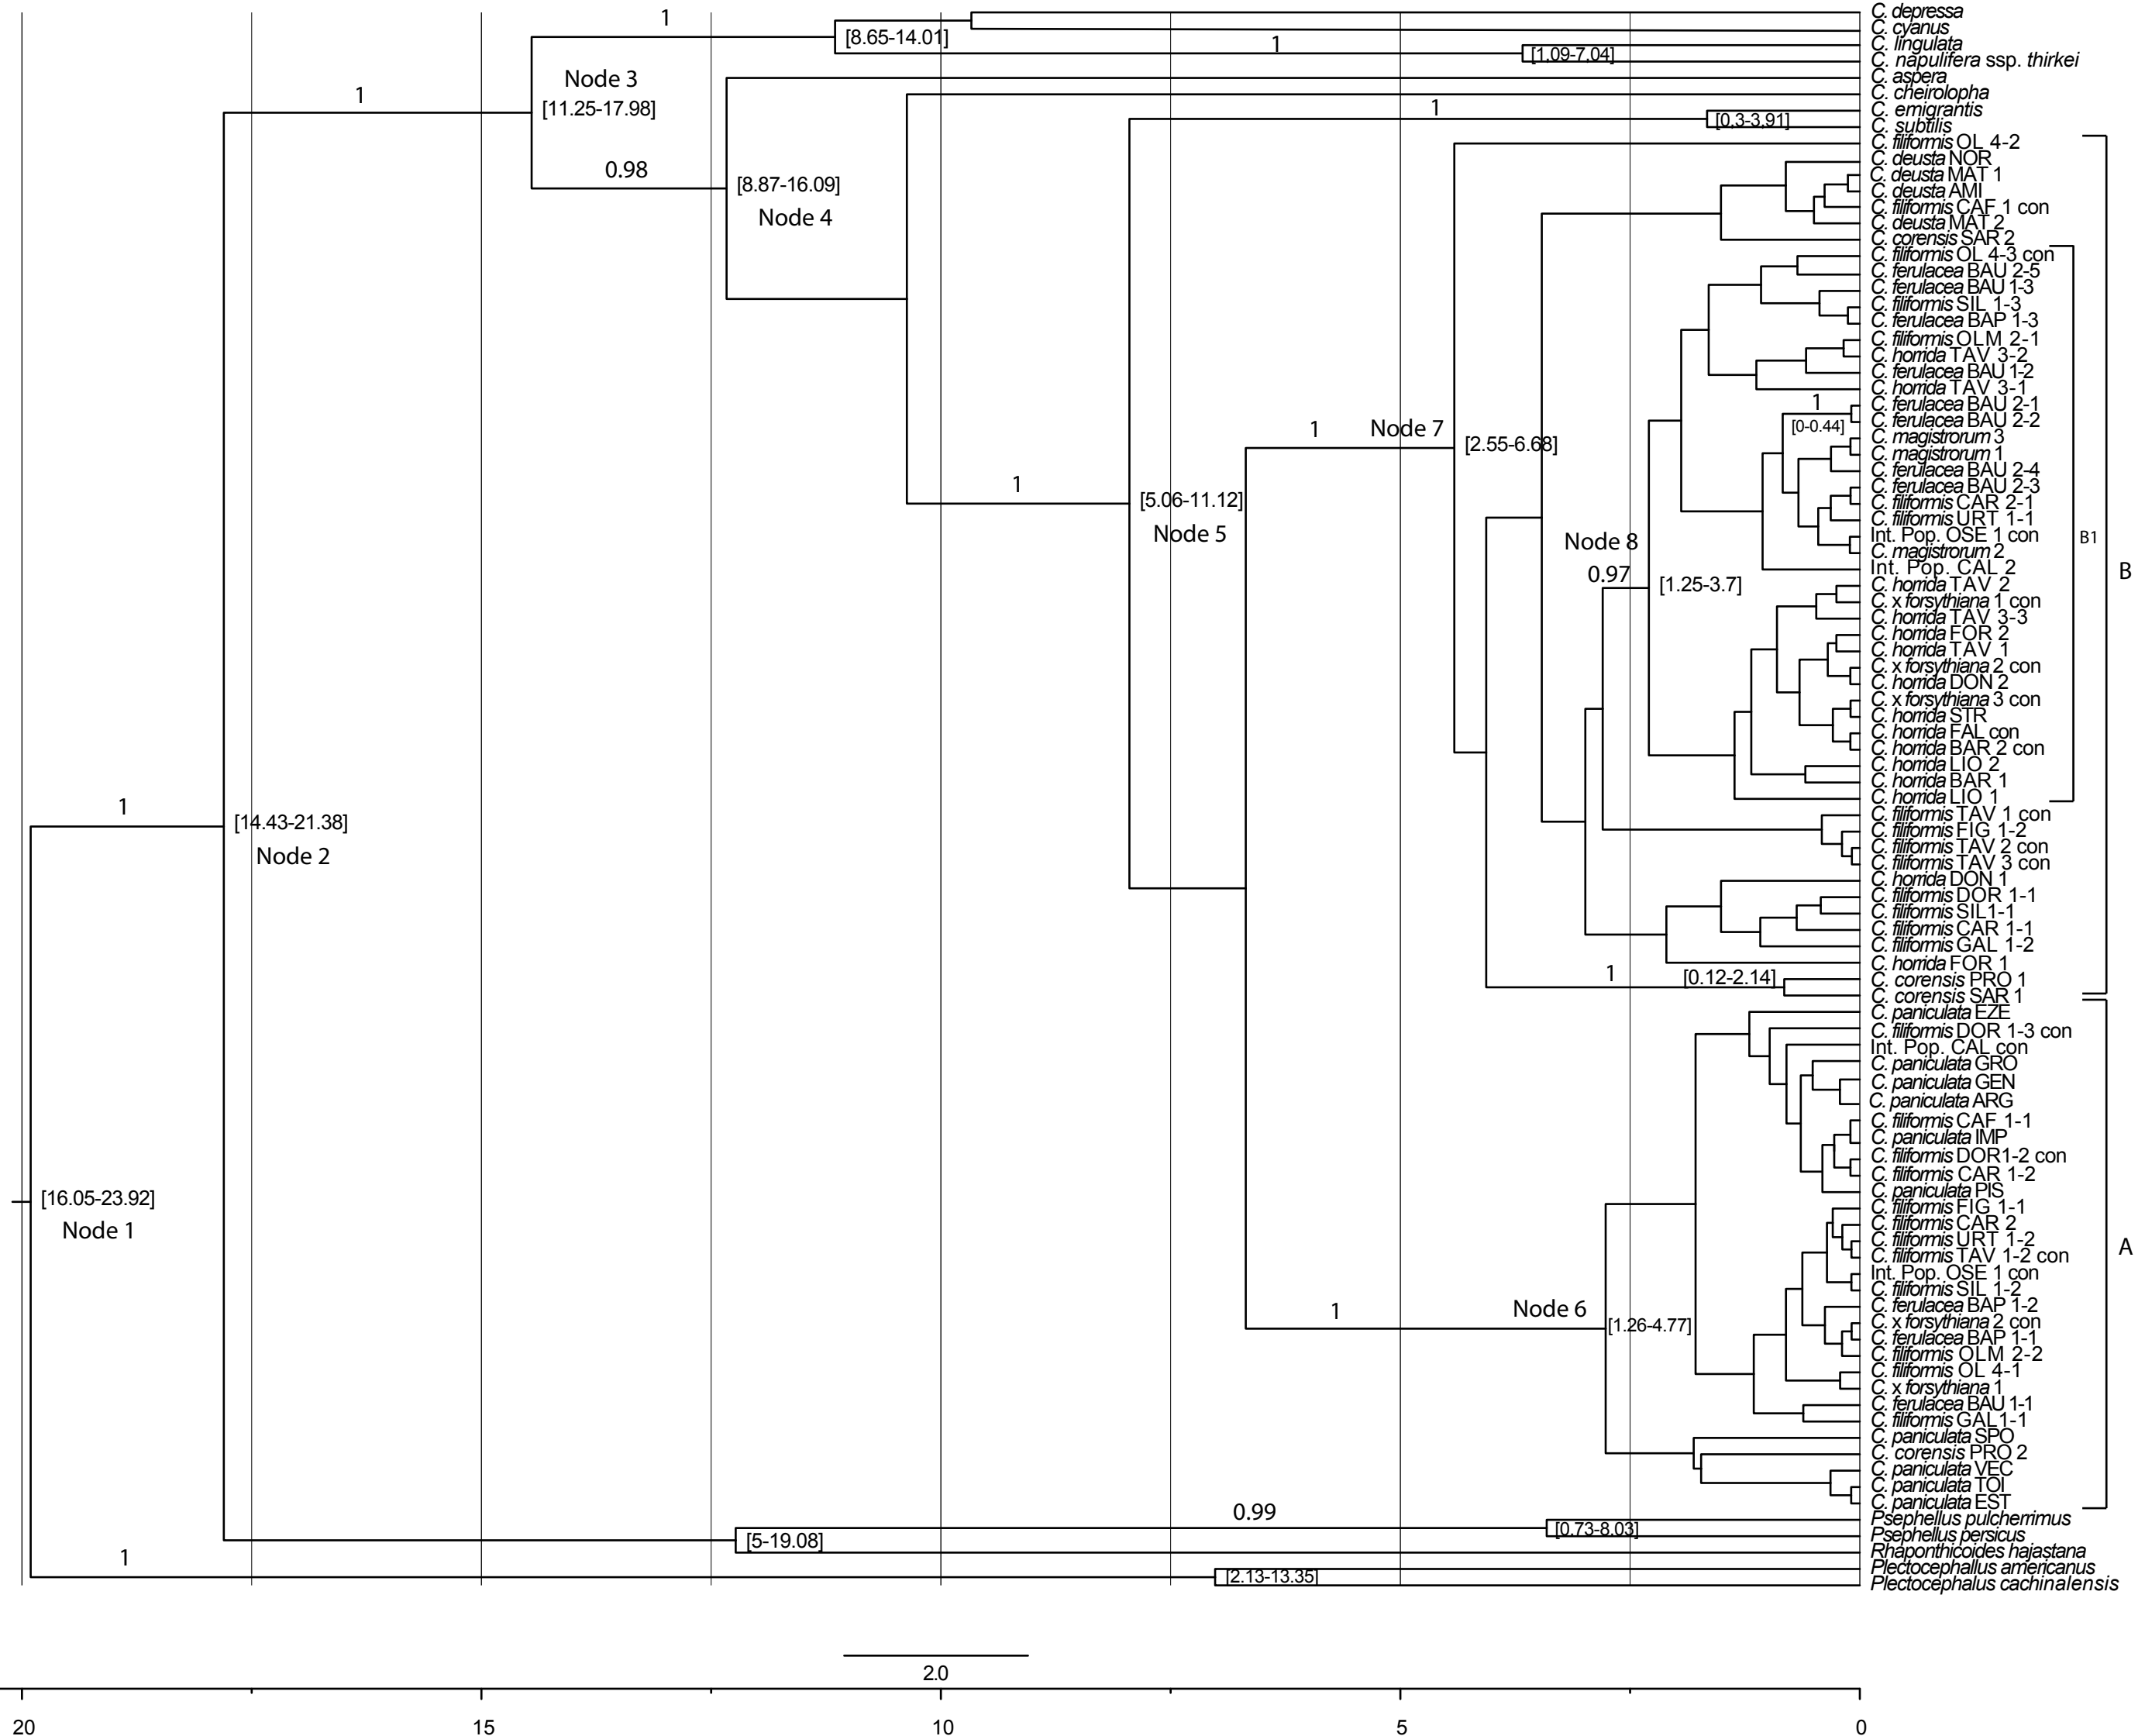

Supplement: pone.0228776.s001.pdf [file pone.0228776.s001.pdf]
